# Supplementary material for: The Impact of p53 Dysfunction in ATR Inhibitor Cytotoxicity and Chemo- and Radiosensitisation
Source: PubMed Central journal article supplement (PMC6116113; doi:10.3390/cancers10080275), 2018-08-20
Supplement: cancers-10-00275-s001.pdf [file cancers-10-00275-s001.pdf]

# Supplementary Materials: The Impact of p53 Dysfunction in ATR Inhibitor Cytotoxicity and Chemo- and Radiosensitisation

Fiona K. Middleton, John R. Pollard and Nicola J. Curtin

**Table S1.** ATR inhibition by VE-821 in the cell line panel. Cells were co-exposed to 1  $\mu\text{M}$  gemcitabine with increasing concentrations of VE-821 for 1 hour. The  $\text{IC}_{50}$  was interpolated from concentration–response curves. Data are mean and SEM of 3 independent experiments or individual measurements where only 2 experiments were valid.

| p53 wt    |                                    | p53 mutant                |                                    |
|-----------|------------------------------------|---------------------------|------------------------------------|
| Cell line | $\text{IC}_{50}$ ( $\mu\text{M}$ ) | Cell line                 | $\text{IC}_{50}$ ( $\mu\text{M}$ ) |
| HCT116    | $0.92 \pm 0.34$                    | HCT116 p53 <sup>-/-</sup> | $2.46 \pm 0.42$                    |
| U2OS      | 8.95, 4.5                          | U2OS p53DN                | $4.85 \pm 1.77$                    |
| MCF7      | $3.62 \pm 1.94$                    | MDA-MB-231                | $0.57 \pm 0.30$                    |
| MCF10A    | $1.16 \pm 1.32$                    |                           |                                    |

**Table S2.** VE821 single-agent cytotoxicity. Pooled  $\text{LC}_{50}$  values interpolated from survival curves from  $\geq 3$  individual experiments as shown in Figure 1B. Data are mean  $\pm$  SEM from values calculated for each individual experiment. Significance of difference between p53 wt and mutant/null is given in parenthesis.

| p53 wt    |                                    | p53 mutant                |                                    |
|-----------|------------------------------------|---------------------------|------------------------------------|
| Cell line | $\text{LC}_{50}$ ( $\mu\text{M}$ ) | Cell line                 | $\text{LC}_{50}$ ( $\mu\text{M}$ ) |
| HCT116    | $2.13 \pm 1.0$                     | HCT116 p53 <sup>-/-</sup> | $4.56 \pm 1.79$ ( $p = 0.1$ )      |
| U2OS      | $2.54 \pm 2.21$                    | U2OS p53DN                | $3.34 \pm 2.74$ ( $p = 0.7$ )      |
| MCF7      | $1.89 \pm 0.81$                    | MDA-MB-231                | $1.93 \pm 0.93$ ( $p = 1$ )        |
| MCF10A    | >10                                |                           |                                    |

**Table S3.** Summarised chemosensitisation data for all cell lines.  $\text{LC}_{50}$  values were calculated and compared within each cell line and the potentiation factor at 50% ( $\text{PF}_{50}$ ) cell kill compared between cell lines; both cancer cell lines were potentiated  $>4$ -fold but there was no potentiation in MCF10A (i.e.  $\text{PF}_{50} < 1$ ).

| Cell line                 | $\text{LC}_{50}$ gemcitabine)<br>(nM) | $\text{LC}_{50}$ gemcitabine +VE-821<br>(nM) | Fold potentiation by 1 $\mu\text{M}$ VE-821 |
|---------------------------|---------------------------------------|----------------------------------------------|---------------------------------------------|
| MCF10A                    | $7.8 \pm 1.8$                         | $10.0 \pm 5.4$                               | $0.87 \pm 0.13$                             |
| MCF7                      | $53.4 \pm 3.0$                        | $12.7 \pm 5.3$                               | $4.9 \pm 1.46$                              |
| MDA-MB-231                | $54.6 \pm 29.1$                       | $16.5 \pm 11.0$                              | $4.3 \pm 1.5$                               |
| HCT116                    | $24.6 \pm 31.0$                       | $11.5 \pm 6.1$                               | $1.5 \pm 0.9$                               |
| HCT116 p53 <sup>-/-</sup> | $42.0 \pm 36.2$                       | $8.7 \pm 2.1$                                | $4.3 \pm 1.4$ ( $p = 0.035$ )               |
| U2OS                      | $13.7 \pm 5.7$                        | $6.9 \pm 0.5$                                | $1.97 \pm 0.44$                             |
| U2OS DNp53                | $11.1 \pm 7.3$                        | $6.0 \pm 0.6$                                | $1.76 \pm 0.58$                             |

**Table S4.** Summarised Radiosensitisation by VE821 in all cell lines. Data are mean  $\pm$  SEM of 3 independent experiments, p values are from unpaired *t*-tests of the values obtained in each independent experiment. (SF = surviving fraction (%))

| Treatment          | HCT116+/+       | HCT116-/-       | U2OS wt         | U2OS DN         | MCF7            | MDA-MB-231      | MCF10A          |
|--------------------|-----------------|-----------------|-----------------|-----------------|-----------------|-----------------|-----------------|
| SF 2Gy             | 37.7 $\pm$ 5.3  | 33.3 $\pm$ 5.6  | 21.9 $\pm$ 1.7  | 32.6 $\pm$ 2.3  | 31.2 $\pm$ 6.4  | 33.1 $\pm$ 4    | 46.7 $\pm$ 7.2  |
| SF 2Gy + VE-821    | 10.3 $\pm$ 1.3  | 6.4 $\pm$ 1.9   | 4.9 $\pm$ 1.4   | 4.7 $\pm$ 1.7   | 12.0 $\pm$ 2.6  | 16.7 $\pm$ 1.8  | 30.4 $\pm$ 4    |
| fold-sensitization | 3.9 $\pm$ 0.9   | 6.4 $\pm$ 2.01  | 5.72 $\pm$ 2.27 | 11.7 $\pm$ 6.4  | 2.6 $\pm$ 0.04  | 2.05 $\pm$ 0.39 | 1.61 $\pm$ 0.34 |
| <i>p</i>           | 0.0074          | 0.011           | 0.002           | 0.0006          | 0.05            | 0.020           | 0.118           |
| SF 4Gy (%)         | 6.44 $\pm$ 1.2  | 6.5 $\pm$ 0.89  | 4.42 $\pm$ 0.55 | 9.71 $\pm$ 1.6  | 3.78 $\pm$ 0.76 | 13.7 $\pm$ 1.95 | 23.4 $\pm$ 6.8  |
| SF Gy + VE-821 (%) | 1.13 $\pm$ 0.25 | 0.57 $\pm$ 0.23 | 1.2 $\pm$ 0.3   | 0.47 $\pm$ 0.12 | 2.32 $\pm$ 0.33 | 6.03 $\pm$ 0.78 | 20.6 $\pm$ 12   |
| fold-sensitization | 6.67 $\pm$ 2.5  | 18.7 $\pm$ 9.9  | 4.11 $\pm$ 1.08 | 26.8 $\pm$ 12.5 | 1.74 $\pm$ 0.45 | 2.32 $\pm$ 0.36 | 1.67 $\pm$ 0.59 |
| <i>p</i>           | 0.013           | 0.003           | 0.007           | 0.005           | 0.152           | 0.022           | 0.851           |

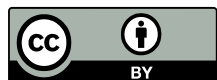

© 2018 by the authors. Submitted for possible open access publication under the terms and conditions of the Creative Commons Attribution (CC BY) license (<http://creativecommons.org/licenses/by/4.0/>).
